# Supplementary material for: Highly efficient copper halide scintillators for high-performance and dynamic X-ray imaging
Source: Royal Society of Chemistry journal article supplement (doi:10.1039/d1nr03996b), 2021-01-01
Supplement: d1nr03996b2.pdf [file d1nr03996b2.pdf]

## Supporting Information

### **Highly Efficient Copper Halide Scintillators for High-Performance and Dynamic X-ray Imaging**

*Quan Zhou, Jiwei Ren, Jiawen Xiao\*, Lin Lei, Feiyi Liao, Haipeng Di, Chao Wang, Lijun Yang, Qi Chen, Xiaofang Yang, Yiyi Zhao\*, Xiaodong Han\**

Q. Zhou, J. Ren, Dr. L. Lei, Dr. F. Liao, H. Di, L. Yang, Prof. Y. Zhao  
Institute of Materials  
China Academy of Engineering Physics  
Jiangyou 621908, China  
E-mail: [zhaoyiyi@caep.cn](mailto:zhaoyiyi@caep.cn)

Q. Zhou, Prof. J. Xiao, C. Wang, Prof. X. Han  
Institute of Microstructure and Property of Advanced Materials, Beijing Key Lab of  
Microstructure and Property of Advanced Materials, faculty of materials and  
manufacturing  
Beijing University of Technology  
Beijing 100124, China  
E-mail: [xiaojw@bjut.edu.cn](mailto:xiaojw@bjut.edu.cn); [xdhan@bjut.edu.cn](mailto:xdhan@bjut.edu.cn)

Prof. Q. Chen  
School of Materials Science & Engineering  
Beijing Institute of Technology  
Beijing 100081, China

Prof. X. Yang  
College of Materials Science and Engineering  
Chongqing University  
Chongqing 400044, China

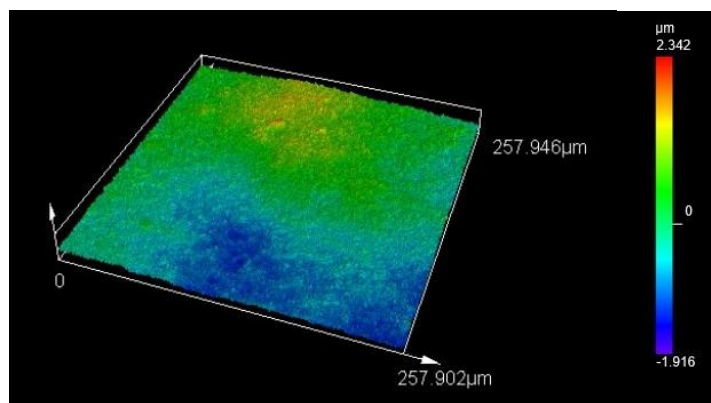

**Figure S1.** 3D image of the drop-casted  $\beta$ - $\text{Cs}_3\text{Cu}_2\text{Cl}_5$  film generated by a laser scanning confocal microscope.

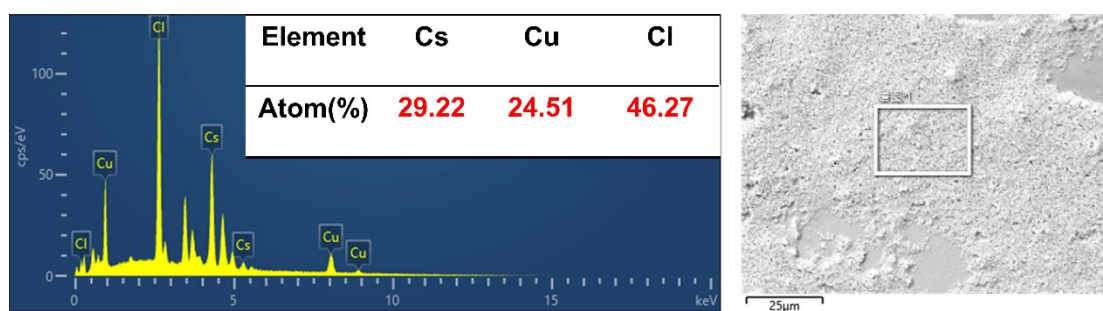

**Figure S2.** EDS elemental analysis of  $\beta$ - $\text{Cs}_3\text{Cu}_2\text{Cl}_5$  film.

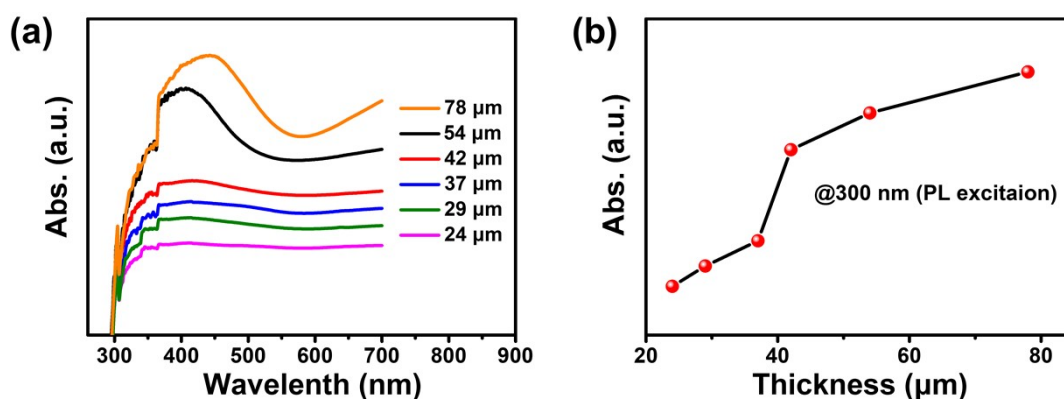

**Figure S3.** (a) UV-vis absorption spectra of films with varied thickness (b) Absorbance value at 300 nm of series films with varied thickness.

Due to the measurement limits of the UV-Vis absorption spectrometer, we cannot obtain the absorption spectra of films thicker than 80  $\mu\text{m}$ . The absorption data with varied thickness (smaller than 80  $\mu\text{m}$ ) were provided, as shown in **Figure S3**. The increased baseline in the absorption spectra shown in the left figure is mainly caused by the enhanced light scattering from the increased surface roughness (**Figure S4**). The absorption at 300 nm of  $\beta\text{-Cs}_3\text{Cu}_2\text{Cl}_5$  films increases with the increased film thickness (no thicker than 80  $\mu\text{m}$ ), as shown in **Figure S3(b)**, indicating that the corresponding enhanced PL intensity in **Figure 2b**.

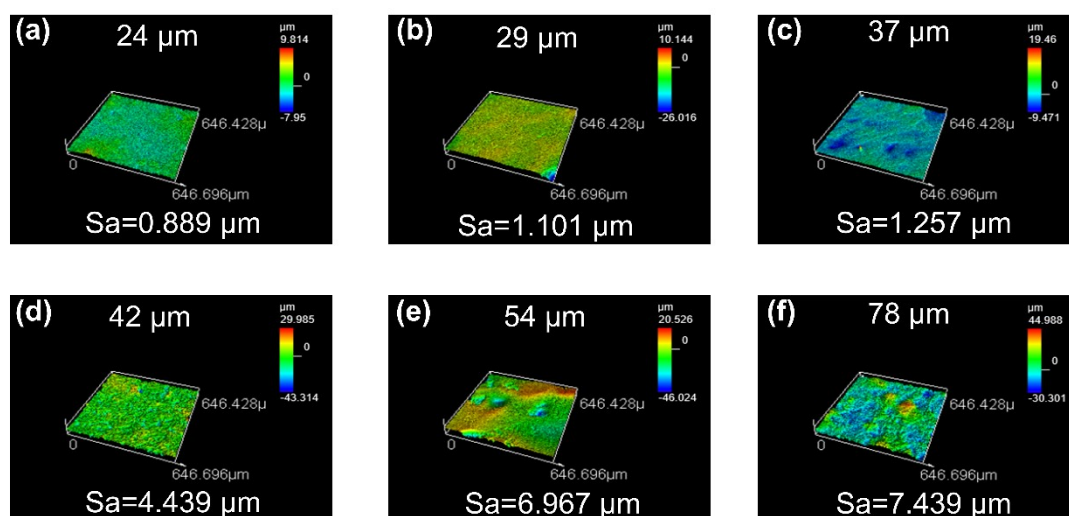

**Figure S4.** Surface roughness of  $\beta\text{-Cs}_3\text{Cu}_2\text{Cl}_5$  films in varied thickness.

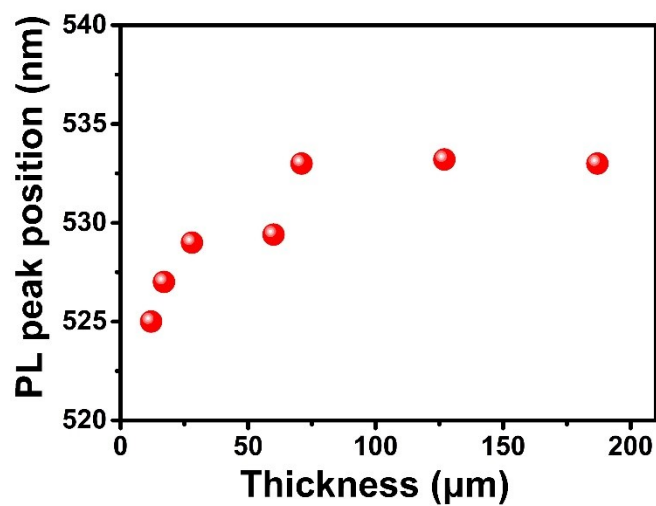

Figure S5. PL spectra peak positions of the  $\beta$ -Cs<sub>3</sub>Cu<sub>2</sub>Cl<sub>5</sub> films in different thickness.

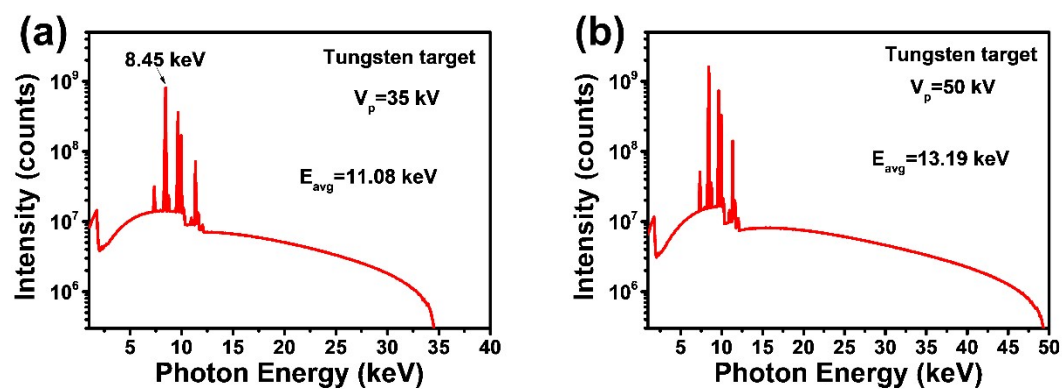

Figure S6. X-ray photon energy spectra generated by tungsten target at accelerating voltage of (a) 35 kV and (b) 50 kV.

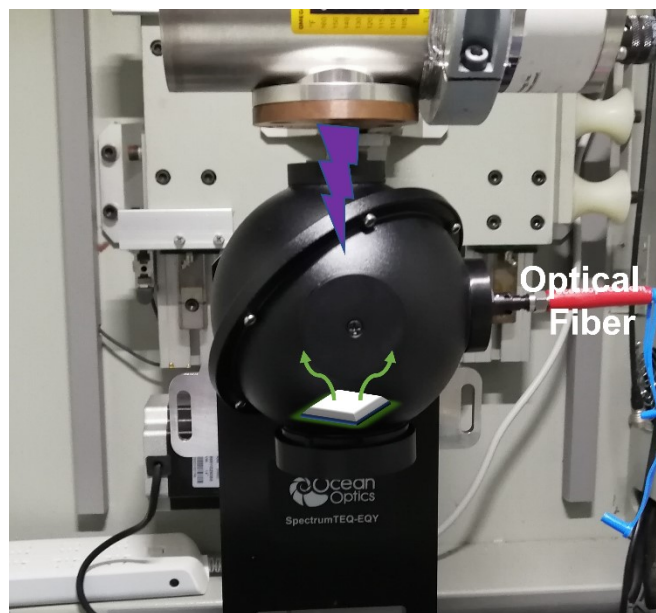

**Figure S7.** Photograph of the radioluminescence (RL) measurement system.

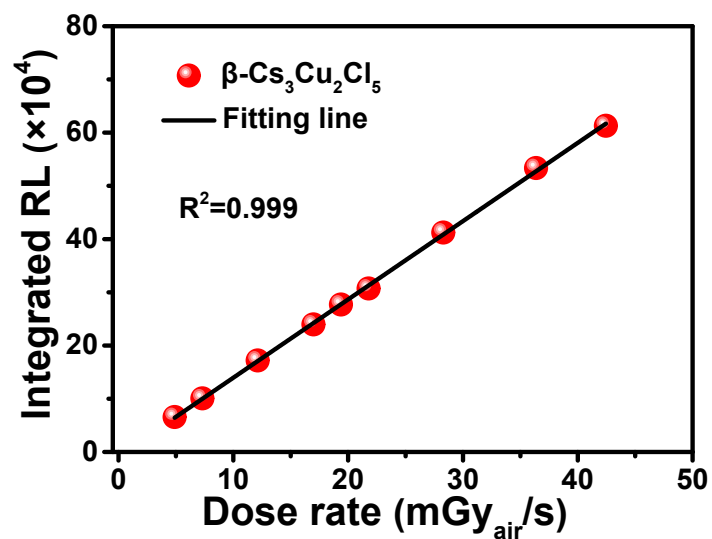

**Figure S8.** Linear relationship between integrated RL intensity of the  $\beta\text{-Cs}_3\text{Cu}_2\text{Cl}_5$  films and X-ray dose rate.

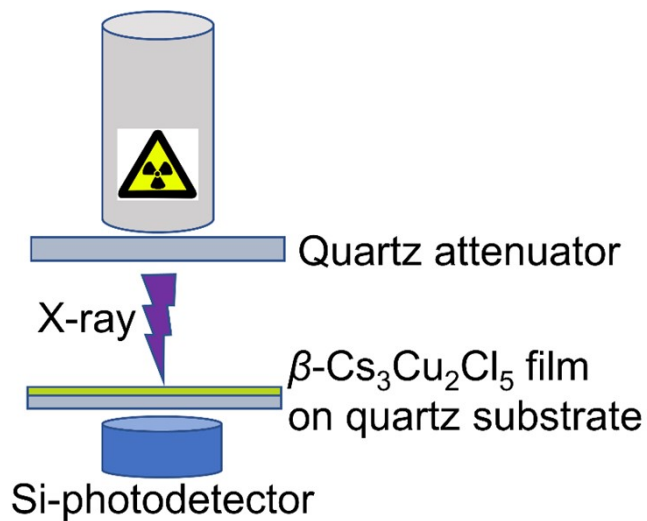

**Figure S9.** Schematic illustration of RL light power measurement system.

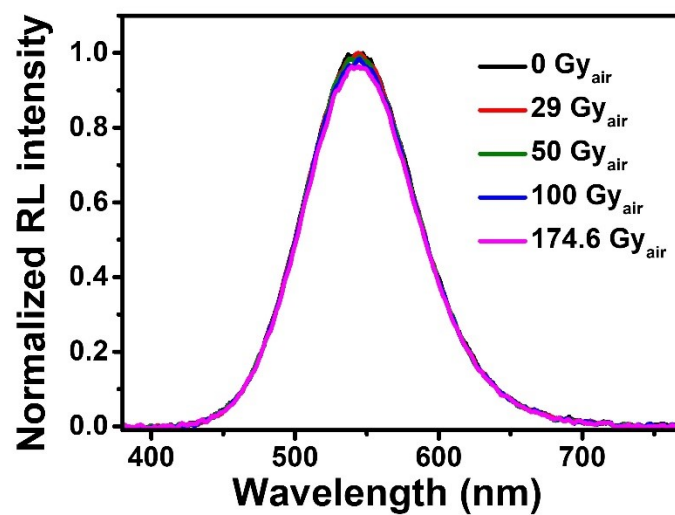

**Figure S10.** RL spectra of the  $\beta\text{-Cs}_3\text{Cu}_2\text{Cl}_5$  films after being irradiated by various X-ray total dose.

**Table S1.** Comparison of X-ray irradiation hardness of  $\beta$ -Cs<sub>3</sub>Cu<sub>2</sub>Cl<sub>5</sub>, CsI:Tl, and Cs<sub>2</sub>Ag<sub>0.6</sub>Na<sub>0.4</sub>InCl<sub>6</sub>:Yb<sup>3+</sup>/Er<sup>3+</sup>/Bi<sup>3+</sup> (RE-1).

| Total X-ray dose [Gy <sub>air</sub> ] |                                                          | 0    | 13    | 29    | 53    | Ref.      |
|---------------------------------------|----------------------------------------------------------|------|-------|-------|-------|-----------|
| Normalized RL intensity               | $\beta$ -Cs <sub>3</sub> Cu <sub>2</sub> Cl <sub>5</sub> | 100% | 99.2% | 99.1% | 98.6% | This work |
|                                       | CsI:Tl                                                   | 100% | ~97%  | ~50%  | ~28%  | [1]       |
|                                       | RE-1                                                     | 100% | 71%   | 60%   | 49%   | [2]       |

### Slanted-edge method:<sup>[3]</sup>

Firstly, the X-ray images was converted into grey-scale map and the edge spread function (ESF) stands for the grey information along a certain direction. The line spread function (LSF) could be deduced by taking the differential on the edge spread function (ESF), as following:

$$LSF(x) = \frac{dESF(x)}{dx}$$

Where  $x$  is the position of pixels, which is defined by following formular:

$$x = \frac{N \cdot d}{\beta}$$

Where  $N$  is the ordinal number of the image along a certain direction,  $d$  is the pixel size (about 6  $\mu$ m) of the CMOS sensor in camera and  $\beta$  is the optical magnification.

Modulation Transfer Function (MTF) curve can be deduced by the Fourier transform of the LSF, as following:

$$MTF(v) = F(LSF(x))$$

Where  $v$  is the spatial frequency.

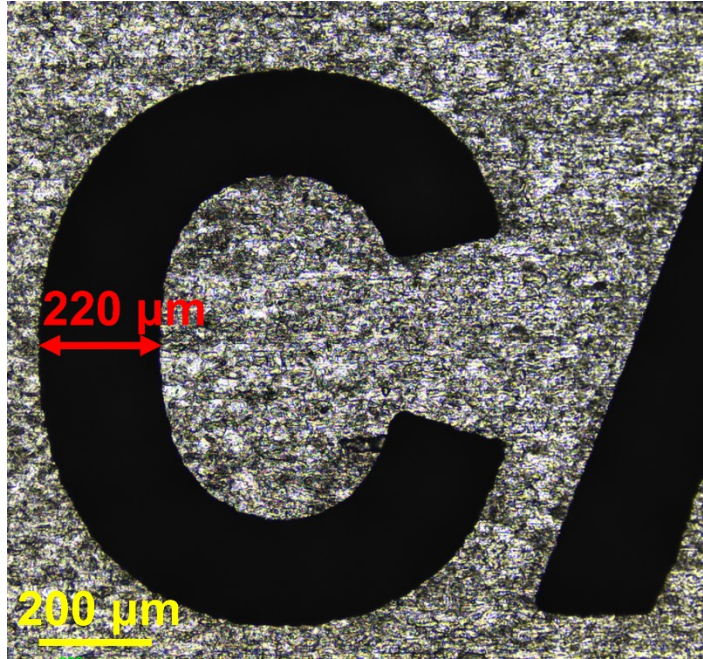

**Figure S11.** Optical microscope photograph showing the line width of the smallest CAEP letters in the mask.

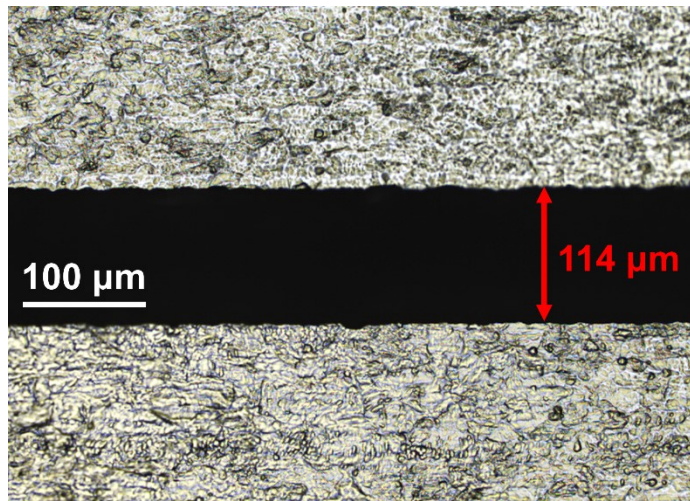

**Figure S12.** Optical microscope photograph of the finest line in the mask.



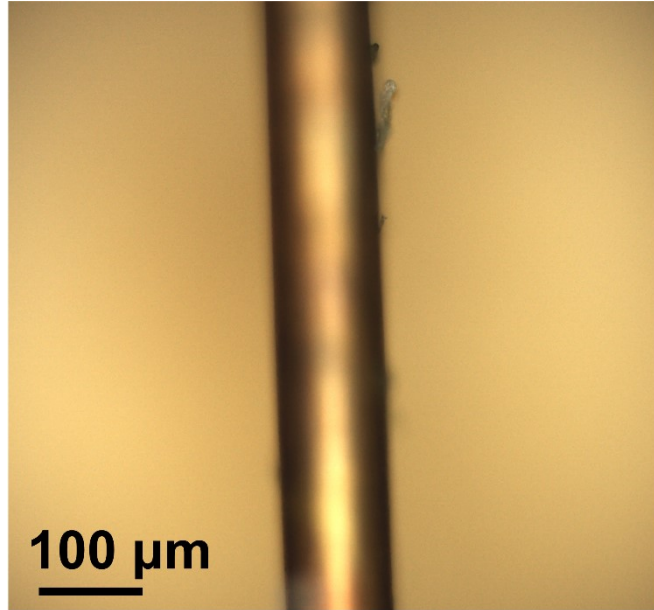

**Figure S13.** Optical microscope photograph of the copper wire with a diameter of 100 μm.

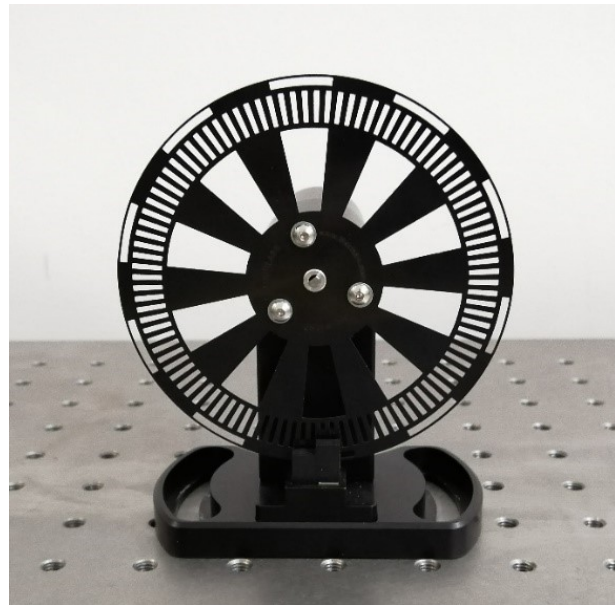

**Figure S14.** Photograph of the chopper blades.

## Reference

- [1] Y. Wang, X. Yin, W. Liu, J. Xie, J. Chen, M. A. Silver, D. Sheng, L. Chen, J. Diwu, N. Liu, Z. Chai, T. E. Albrecht-Schmitt, S. Wang, *Angew. Chem., Int. Ed.* **2018**, 57, 7883.
- [2] Z. Zeng, B. Huang, X. Wang, L. Lu, Q. Lu, M. Sun, T. Wu, T. Ma, J. Xu, Y. Xu, S. Wang, Y. Du, C.-H. Yan, *Adv. Mater.* **2020**, 32, 2004506.
- [3] W. Ma, T. Jiang, Z. Yang, H. Zhang, Y. Su, Z. Chen, X. Chen, Y. Ma, W. Zhu, X. Yu, H. Zhu, J. Qiu, X. Liu, X. Xu, Y. Yang, *Advanced Science* **2021**, 8, 2003728.
